# Supplementary material for: A germline-specific class of small RNAs binds mammalian Piwi proteins
Source: Springer Nature journal article supplement (doi:10.1038/nature04917), 2006-06-04
Supplement: 41586_2006_BFnature04917_MOESM3_ESM.pdf [file 41586_2006_BFnature04917_MOESM3_ESM.pdf]

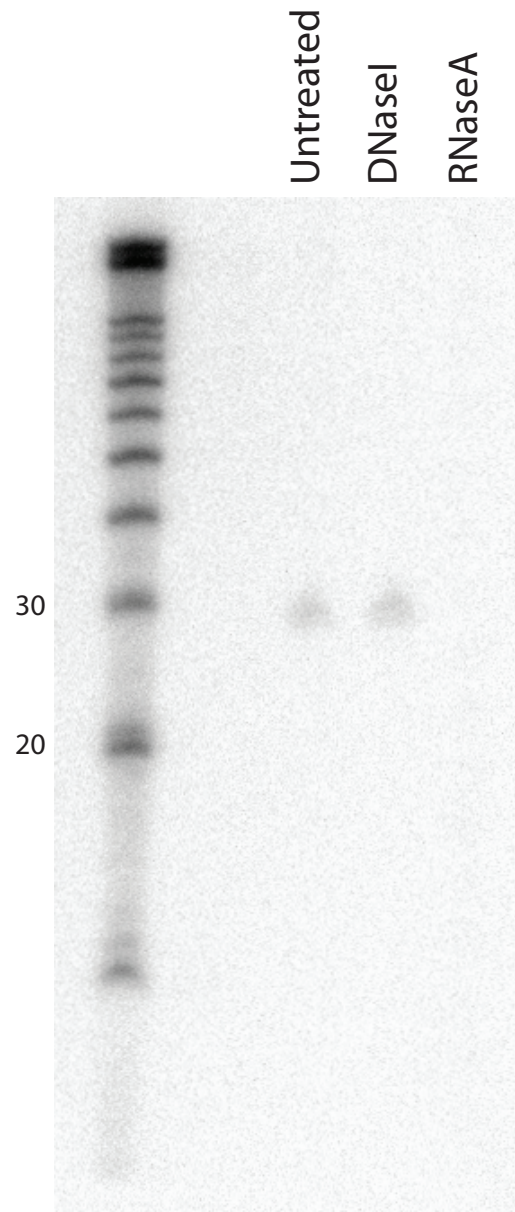

**Figure S1. piRNAs are degraded by RNaseA but not by DNaseI.**

Northern blot analysis of untreated, DNaseI-treated and RNaseA-treated total testis RNA, using piR-1 as a probe.

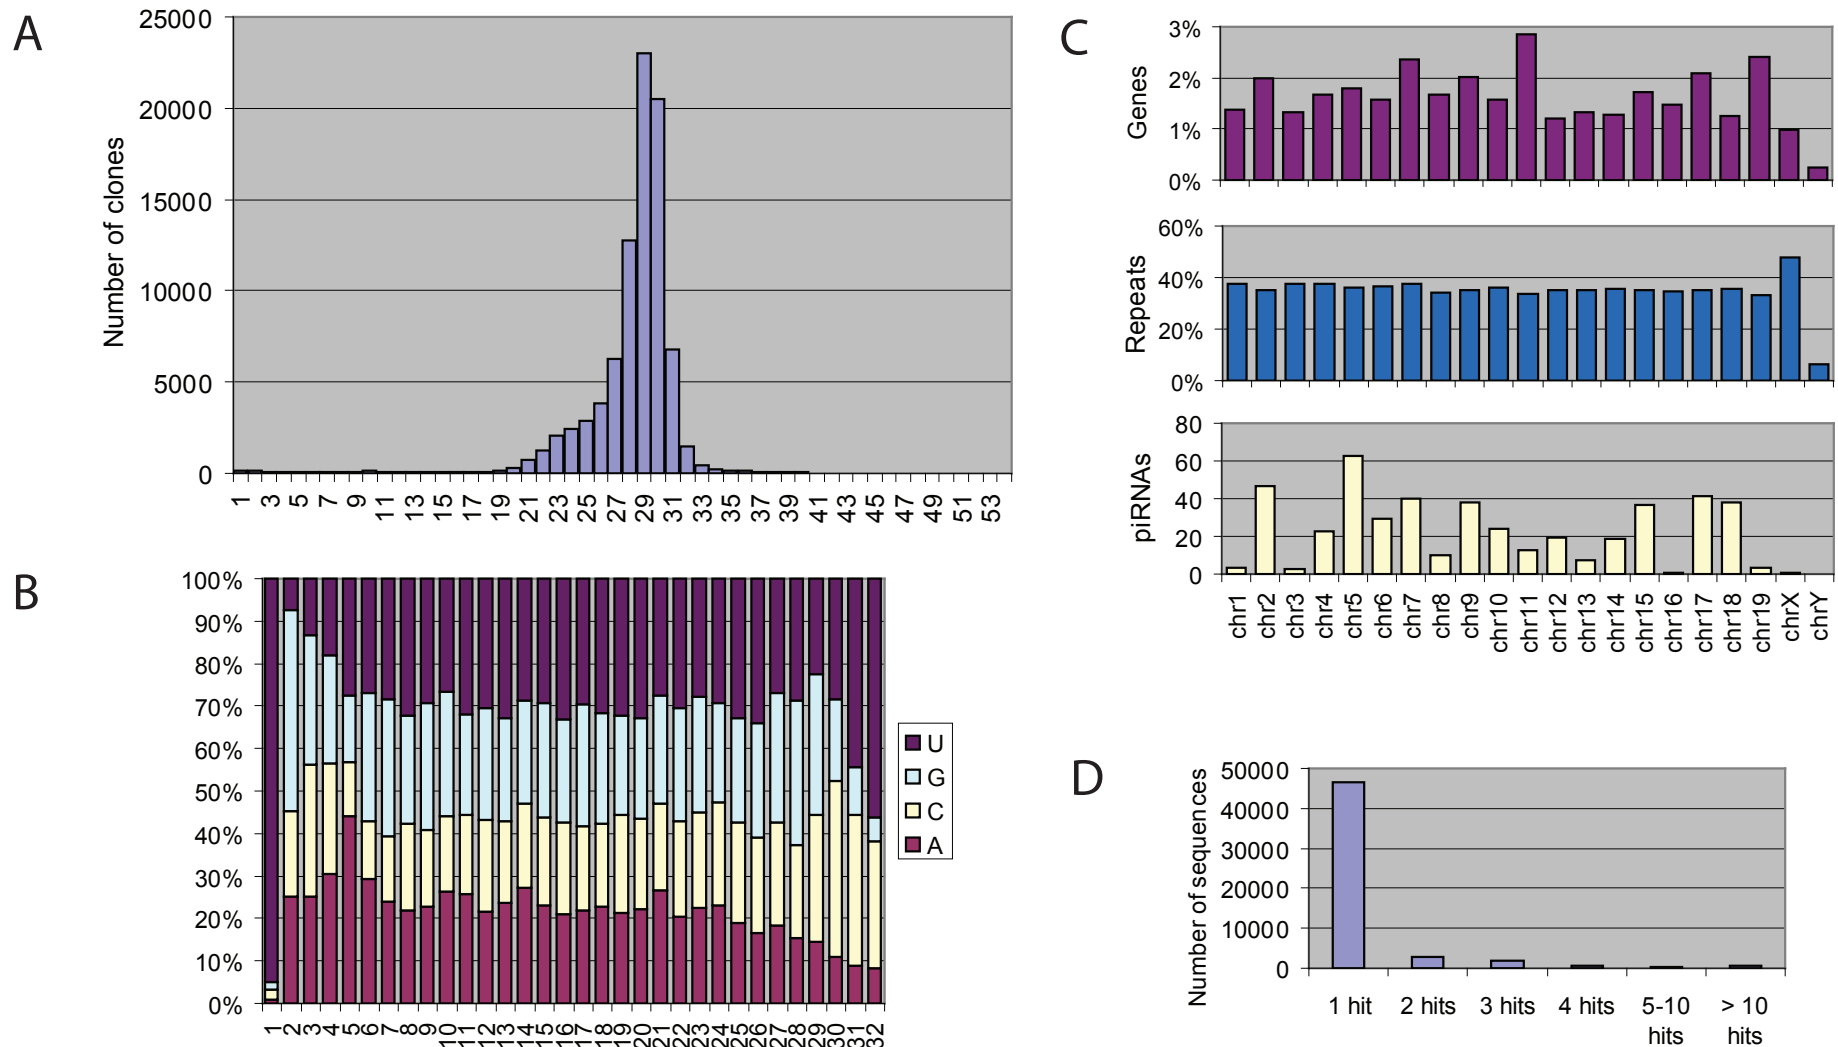

**Figure S2. General features of piRNAs in mouse.**

**a**, Size distribution of the total pool of cloned sequences. **b**, Nucleotide bias of the small RNAs. For each position, the proportion of A, U, G and C found in the cloned sequences is represented. **c**, Chromosome distribution of cloned sequences. The number of bases in exons of Refseq genes and repeats are plotted as a percentage of overall chromosome length. Numbers of piRNAs are normalized to chromosome length and multiplied by 106 for graphing purposes. **d**, Mapping frequency of the sequences. Clones with a given number of matches (hits) to the genome are plotted, allowing no more than 2 mismatches along the length of the RNA.
